# Supplementary material for: Snowmelt seepage fluxes of dissolved organic matter in forest and grassland – a molecular-level case study from the Hainich Critical Zone Exploratory, Germany
Source: Frontiers journal article supplement (doi:10.3389/feart.2024.1458322), 2024-10-21
Supplement: Image_1.pdf [file Image_1.pdf]

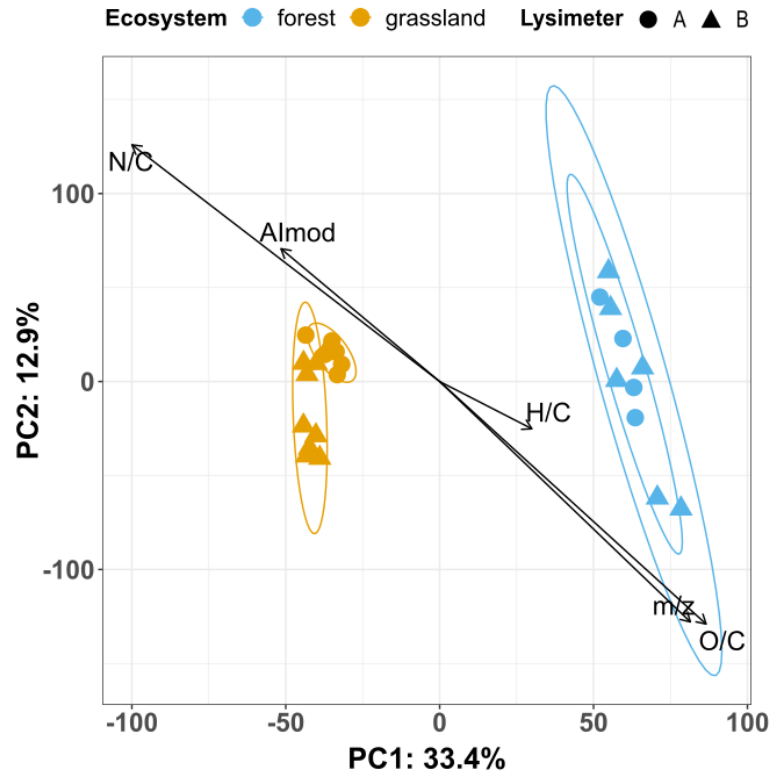

**Figure 1.** Principal component analysis (PCA) graph based on the molecular composition of DOM samples
